# Supplementary material for: Monte Carlo simulation and SAFT modeling study of the solvation thermodynamics of dimethylformamide, dimethylsulfoxide, ethanol and 1-propanol in the ionic liquid trimethylbutylammonium bis(trifluoromethylsulfonyl)imide
Source: Royal Society of Chemistry journal article supplement (doi:10.1039/c4cp05961a), 2015-01-01
Supplement: c4cp05961a1.pdf [file c4cp05961a1.pdf]

## Supporting Information

for

*Monte Carlo Simulation and SAFT Modeling Study of the  
Solvation Thermodynamics of Dimethylformamide,  
Dimethylsulfoxide, Ethanol and 1-Propanol in the Ionic  
Liquid Trimethylbutylammonium  
Bis(trifluoromethylsulfonyl)imide*

Amir Vahid<sup>†</sup> and Edward J. Maginn<sup>†\*</sup>

<sup>†</sup>Department of Chemical and Biomolecular Engineering, University of Notre Dame,  
Notre Dame, IN 46556, USA

\* Corresponding author: ed@nd.edu

## S1. TRANSFERABLE POTENTIALS

The equation for the classical AMBER/OPLS style force field used here is as follows

$$\begin{aligned}
 U_{\text{tot}} &= U_{\text{ext}} + U_{\text{int}} \\
 U_{\text{ext}} &= U_{\text{disp(vdW)}} + U_{\text{rep}} + U_{\text{pol}} + U_{\text{el}} \\
 U_{\text{int}} &= U_{\text{str}} + U_{\text{bend}} + U_{\text{tors}} + U_{\text{improper}} \quad \backslash * \\
 U_{\text{tot}} &= \sum_{i=1}^{N-1} \sum_{j>i}^N 4\epsilon_{ij} \left[ \left( \frac{\sigma}{r} \right)^{12} - \left( \frac{\sigma}{r} \right)^6 \right] + \sum_{i=1}^{N-1} \sum_{j>i}^N \frac{q_i q_j}{r_{ij}} + \\
 &\quad \sum_{\text{bonds}} K_r (r - r_0)^2 + \sum_{\text{angles}} K_\theta (\theta - \theta_0)^2 + \sum_{\text{dihedrals}} K_\chi [1 + \cos(n\chi - \delta)] \\
 &\quad \quad \quad U_{\text{disp(vdW)}} + U_{\text{rep}} \quad \quad \quad U_{\text{el}} \quad \quad \quad U_{\text{str}} \quad \quad \quad U_{\text{bend}} \quad \quad \quad U_{\text{tors}}
 \end{aligned}$$

MERGEFORMAT (1)

where  $U_{\text{ext}}$  stands for external (intermolecular) energy between distinct molecules and  $U_{\text{int}}$  is the intramolecular energy between sites belonging to the same molecule,  $U_{\text{disp(vdW)}}$  is the van der Waals dispersion energy,  $U_{\text{rep}}$  is the repulsive energy,  $U_{\text{pol}}$  is the polarization energy,  $U_{\text{el}}$  is the electrostatic potential energy,  $U_{\text{str}}$  is the stretching energy associated with the variation of bond length,  $U_{\text{bend}}$  is the bending energy arising from the angular fluctuations formed by two adjacent chemical bonds,  $U_{\text{tors}}$  is the torsion energy caused by the variation of the dihedral angles formed by four successive sites in a chain,  $U_{\text{improper}}$  is the improper torsion energy pertains to the energy that enforce an aromatic ring or a conjugated structure to keep its planar form. The force fields used in this work are all nonpolarizable and there are no rings or conjugated structures present in the molecular architectures. Therefore,  $U_{\text{pol}}$  and  $U_{\text{improper}}$  are omitted from eq \\*

MERGEFORMAT (1). The constituent terms of the extended equations are:  $K_r$ ,  $K_\theta$ , and  $K_\chi$  which are energy coefficients for bonds, angles, and dihedrals contributions, respectively,  $\epsilon_{ij}$  and  $\sigma_{ij}$  are the energy and size parameters between sites  $i$  and  $j$  in the Lennard-Jones (LJ) potential, and  $q_i$  is the charge placed on the center of site  $i$ . Also, Lorentz-Berthelot<sup>1, 2</sup> combining rules were the basis for calculating of the mixed site-site interactions.

For the [Tf<sub>2</sub>N] anion, like Zhong et al.<sup>3</sup> and Liu et al.<sup>4</sup> a scaling factor of ½ has been used for both of the Coulombic and LJ interactions between molecular sites separated by three consecutive bonds. However, this factor set to zero for sites separated by less than three consecutive bonds. The bond, angle, and dihedral terms are taken from Zhong and coworkers<sup>3</sup> and their values have been listed in Tables S1 of this Supporting Information. The LJ parameters for the cation, however, were modified from the work of Zhong et al.<sup>3</sup> as discussed in subsequent sections. The [N<sub>1114</sub>] cation is based on the TraPPE-UA force field for alkanes<sup>5</sup>, amines<sup>6</sup> and ammonium<sup>7</sup> in which a scaling factor of ½ has been implemented for Coulombic and LJ interactions. In this case, there is also a need for LJ parameter optimization based on the experimental liquid density and surface tension of [N<sub>1114</sub>][Tf<sub>2</sub>N], as discussed in the next section.

For EtOH and C<sub>3</sub>OH, bonds, angles, dihedral, and LJ terms are taken from a UAM version of TraPPE-Alcohols<sup>6, 8</sup> which applies a scaling factor of ½ to both the LJ and Coulombic terms. This force field has been tested against experimental vapor pressure, heat of vaporization, and liquid density data and hence there was no need for further calibration/optimization.

DMF and DMSO follow a rigid OPLS type of the force field proposed by Chalaris and Samios<sup>9-11</sup>, and Mancera and coworkers<sup>12</sup>. Clearly, the 1-4 scaling parameter is set to ½ for LJ and Coulombic terms in an OPLS force field style. For DMSO, however, another Gromos type

force field based on traditional potential types for biomolecules has also been proposed and calibrated against the experimental vapor pressure and liquid density data.

**Table S1.** Force field parameters for the solutes and the ionic liquid considered in this work.

| Non-bonded terms                  |                       |                       |         |
|-----------------------------------|-----------------------|-----------------------|---------|
|                                   | vdW parameters        | Charges (e)           |         |
| Ethanol                           |                       |                       |         |
| UA sites                          | $\sigma / \text{\AA}$ | $\epsilon / \text{K}$ | $q / e$ |
| CH <sub>3</sub> <sup>alk</sup>    | 3.75                  | 98.0                  | 0.00    |
| CH <sub>2</sub> <sup>A</sup>      | 3.95                  | 46.0                  | 0.265   |
| O <sup>A</sup>                    | 3.02                  | 93.0                  | -0.700  |
| H <sup>A</sup>                    | 0.00                  | 0.00                  | 0.435   |
| 1-Propanol                        |                       |                       |         |
| UA sites                          | $\sigma / \text{\AA}$ | $\epsilon / \text{K}$ | $q / e$ |
| CH <sub>3</sub> <sup>alk</sup>    | 3.75                  | 98.0                  | 0.00    |
| CH <sub>2</sub> <sup>alk</sup>    | 3.95                  | 46.0                  | 0.000   |
| CH <sub>2</sub> <sup>A</sup>      | 3.95                  | 46.0                  | 0.265   |
| O <sup>A</sup>                    | 3.02                  | 93.0                  | -0.700  |
| H <sup>A</sup>                    | 0.00                  | 0.00                  | 0.435   |
| Dimethylformamide                 |                       |                       |         |
| UA sites                          | $\sigma / \text{\AA}$ | $\epsilon / \text{K}$ | $q / e$ |
| CH <sub>3</sub> <sup>DMF</sup>    | 3.80                  | 69                    | 0.28    |
| N <sup>DMF</sup>                  | 3.20                  | 144                   | -0.57   |
| C <sup>DMF</sup>                  | 3.70                  | 47.3                  | 0.45    |
| O <sup>DMF</sup>                  | 2.96                  | 226                   | -0.50   |
| H <sup>DMF</sup>                  | 2.20                  | 7.18                  | 0.06    |
| Dimethylsulfoxide                 |                       |                       |         |
| UA sites                          | $\sigma / \text{\AA}$ | $\epsilon / \text{K}$ | $q / e$ |
| CH <sub>3</sub> <sup>DMSO</sup>   | 3.81                  | 125                   | 0.160   |
| S <sup>DMSO</sup>                 | 3.47                  | 214                   | 0.139   |
| O <sup>DMSO</sup>                 | 2.83                  | 176                   | -0.459  |
| Bis(trifluoromethylsulfonyl)imide |                       |                       |         |
| UA sites                          | $\sigma / \text{\AA}$ | $\epsilon / \text{K}$ | $q / e$ |
| O <sup>Tf2N</sup>                 | 2.96                  | 106                   | -0.398  |
| CF <sub>3</sub> <sup>Tf2N</sup>   | 4.47                  | 80.5                  | -0.095  |
| S <sup>Tf2N</sup>                 | 3.56                  | 126                   | 0.627   |
| N <sup>Tf2N</sup>                 | 3.25                  | 85.6                  | -0.272  |
| Trimethylbutylammonium            |                       |                       |         |
| UA sites                          | $\sigma / \text{\AA}$ | $\epsilon / \text{K}$ | $q / e$ |

|                                                                              |                            |                                 |                              |
|------------------------------------------------------------------------------|----------------------------|---------------------------------|------------------------------|
| CH <sub>3</sub> <sup>N</sup>                                                 | 3.57                       | 98.0                            | 0.175                        |
| CH <sub>2</sub> <sup>N</sup>                                                 | 3.75                       | 46.0                            | 0.175                        |
| N <sup>AM</sup>                                                              | 3.25                       | 185                             | 0.100                        |
| CH <sub>2</sub> <sup>alk</sup>                                               | 3.95                       | 46.0                            | 0.00                         |
| CH <sub>3</sub> <sup>alk</sup>                                               | 3.75                       | 98.0                            | 0.00                         |
| Bonded terms                                                                 |                            |                                 |                              |
| Ethanol                                                                      |                            |                                 |                              |
| Bond                                                                         | $K_l / K \text{ \AA}^{-2}$ | $l_0 / \text{ \AA}$             |                              |
| CH <sub>3</sub> <sup>alk</sup> -CH <sub>2</sub> <sup>A</sup>                 | Fixed                      | 1.54                            |                              |
| CH <sub>2</sub> <sup>A</sup> -O <sup>A</sup>                                 | Fixed                      | 1.43                            |                              |
| O <sup>A</sup> -H <sup>A</sup>                                               | Fixed                      | 0.945                           |                              |
| 1-Propanol                                                                   |                            |                                 |                              |
|                                                                              | $K_l / K \text{ \AA}^{-2}$ | $l_0 / \text{ \AA}$             |                              |
| CH <sub>3</sub> <sup>alk</sup> -CH <sub>2</sub> <sup>alk</sup>               | Fixed                      | 1.54                            |                              |
| CH <sub>2</sub> <sup>alk</sup> -CH <sub>2</sub> <sup>A</sup>                 | Fixed                      | 1.54                            |                              |
| CH <sub>2</sub> <sup>A</sup> -O <sup>A</sup>                                 | Fixed                      | 1.43                            |                              |
| O <sup>A</sup> -H <sup>A</sup>                                               | Fixed                      | 0.945                           |                              |
| Dimethylformamide                                                            |                            |                                 |                              |
|                                                                              | $K_l / K \text{ \AA}^{-2}$ | $l_0 / \text{ \AA}$             |                              |
| CH <sub>3</sub> <sup>DMF</sup> -N <sup>DMF</sup>                             | Fixed                      | 1.44                            |                              |
| N <sup>DMF</sup> -C <sup>DMF</sup>                                           | Fixed                      | 1.13                            |                              |
| C <sup>DMF</sup> -O <sup>DMF</sup>                                           | Fixed                      | 1.23                            |                              |
| H <sup>DMF</sup> -C <sup>DMF</sup>                                           | Fixed                      | 1.12                            |                              |
| Dimethylsulfoxide                                                            |                            |                                 |                              |
|                                                                              | $K_l / K \text{ \AA}^{-2}$ | $l_0 / \text{ \AA}$             |                              |
| CH <sub>3</sub> <sup>DMSO</sup> -S <sup>DMSO</sup>                           | Fixed                      | 1.80                            |                              |
| S <sup>DMSO</sup> -O <sup>DMSO</sup>                                         | Fixed                      | 1.53                            |                              |
| Bis(trifluoromethylsulfonyl)imide                                            |                            |                                 |                              |
|                                                                              | $K_l / K \text{ \AA}^{-2}$ | $l_0 / \text{ \AA}$             |                              |
| CF <sub>3</sub> <sup>Tf2N</sup> -S <sup>Tf2N</sup>                           | Fixed                      | 2.40                            |                              |
| O <sup>Tf2N</sup> -S <sup>Tf2N</sup>                                         | Fixed                      | 1.45                            |                              |
| S <sup>Tf2N</sup> -N <sup>Tf2N</sup>                                         | Fixed                      | 1.57                            |                              |
| Trimethylbutylammonium                                                       |                            |                                 |                              |
| CH <sub>3</sub> <sup>N</sup> -N <sup>AM</sup>                                | Fixed                      | 1.45                            |                              |
| CH <sub>2</sub> <sup>N</sup> -N <sup>AM</sup>                                | Fixed                      | 1.45                            |                              |
| CH <sub>2</sub> <sup>N</sup> -CH <sub>2</sub> <sup>alk</sup>                 | Fixed                      | 1.54                            |                              |
| CH <sub>2</sub> <sup>alk</sup> -CH <sub>2</sub> <sup>alk</sup>               | Fixed                      | 1.54                            |                              |
| CH <sub>2</sub> <sup>alk</sup> -CH <sub>3</sub> <sup>alk</sup>               | Fixed                      | 1.54                            |                              |
| Angle terms                                                                  |                            |                                 |                              |
| Ethanol                                                                      |                            |                                 |                              |
| Angle                                                                        |                            | $K_\theta / K \text{ rad}^{-2}$ | $\theta_0 / \text{ degrees}$ |
| CH <sub>3</sub> <sup>alk</sup> -CH <sub>2</sub> <sup>A</sup> -O <sup>A</sup> |                            | 25200                           | 109.47                       |

|                                                                                                              |  |                                |                             |                               |                            |
|--------------------------------------------------------------------------------------------------------------|--|--------------------------------|-----------------------------|-------------------------------|----------------------------|
| CH <sub>2</sub> <sup>A</sup> -O <sup>A</sup> -H <sup>A</sup>                                                 |  | 27700                          | 108.5                       |                               |                            |
| 1-Propanol                                                                                                   |  |                                |                             |                               |                            |
|                                                                                                              |  | $K_\theta / \text{K rad}^{-2}$ | $\theta_0 / \text{degrees}$ |                               |                            |
| CH <sub>3</sub> <sup>alk</sup> -CH <sub>2</sub> <sup>alk</sup> -CH <sub>2</sub> <sup>A</sup>                 |  | 31250                          | 114                         |                               |                            |
| CH <sub>2</sub> <sup>alk</sup> -CH <sub>2</sub> <sup>A</sup> -O <sup>A</sup>                                 |  | 25200                          | 109.47                      |                               |                            |
| CH <sub>2</sub> <sup>A</sup> -O <sup>A</sup> -H <sup>A</sup>                                                 |  | 27700                          | 108.5                       |                               |                            |
| Dimethylformamide                                                                                            |  |                                |                             |                               |                            |
|                                                                                                              |  | $K_\theta / \text{K rad}^{-2}$ | $\theta_0 / \text{degrees}$ |                               |                            |
| H <sup>DMF</sup> -C <sup>DMF</sup> -N <sup>DMF</sup>                                                         |  | Fixed                          | 114.5                       |                               |                            |
| H <sup>DMF</sup> -C <sup>DMF</sup> -O <sup>DMF</sup>                                                         |  | Fixed                          | 122.5                       |                               |                            |
| N <sup>DMF</sup> -C <sup>DMF</sup> -O <sup>DMF</sup>                                                         |  | Fixed                          | 123                         |                               |                            |
| C <sup>DMF</sup> -N <sup>DMF</sup> -CH <sub>3,1</sub> <sup>DMF</sup>                                         |  | Fixed                          | 120                         |                               |                            |
| C <sup>DMF</sup> -N <sup>DMF</sup> -CH <sub>3,2</sub> <sup>DMF</sup>                                         |  | Fixed                          | 119                         |                               |                            |
| CH <sub>3,1</sub> <sup>DMF</sup> -N <sup>DMF</sup> -CH <sub>3,2</sub> <sup>DMF</sup>                         |  | Fixed                          | 121                         |                               |                            |
| Dimethylsulfoxide                                                                                            |  |                                |                             |                               |                            |
|                                                                                                              |  | $K_\theta / \text{K rad}^{-2}$ | $\theta_0 / \text{degrees}$ |                               |                            |
| O <sup>DMSO</sup> -S <sup>DMSO</sup> -CH <sub>3</sub> <sup>DMSO</sup>                                        |  | Fixed                          | 106.75                      |                               |                            |
| CH <sub>3</sub> <sup>DMSO</sup> -S <sup>DMSO</sup> -CH <sub>3</sub> <sup>DMSO</sup>                          |  | Fixed                          | 97.40                       |                               |                            |
| Bis(trifluoromethylsulfonyl)imide                                                                            |  |                                |                             |                               |                            |
|                                                                                                              |  | $K_\theta / \text{K rad}^{-2}$ | $\theta_0 / \text{degrees}$ |                               |                            |
| CF <sub>3</sub> <sup>Tf2N</sup> -S <sup>Tf2N</sup> -O <sup>Tf2N</sup>                                        |  | 38500.252                      | 103.2                       |                               |                            |
| S <sup>Tf2N</sup> -N <sup>Tf2N</sup> -S <sup>Tf2N</sup>                                                      |  | 30800.201                      | 125.2                       |                               |                            |
| N <sup>Tf2N</sup> -S <sup>Tf2N</sup> -O <sup>Tf2N</sup>                                                      |  | 35329.643                      | 112.7                       |                               |                            |
| O <sup>Tf2N</sup> -S <sup>Tf2N</sup> -O <sup>Tf2N</sup>                                                      |  | 37544.036                      | 114.6                       |                               |                            |
| CF <sub>3</sub> <sup>Tf2N</sup> -S <sup>Tf2N</sup> -N <sup>Tf2N</sup>                                        |  | 39708.103                      | 105.9                       |                               |                            |
| Trimethylbutylammonium                                                                                       |  |                                |                             |                               |                            |
|                                                                                                              |  | $K_\theta / \text{K rad}^{-2}$ | $\theta_0 / \text{degrees}$ |                               |                            |
| CH <sub>3</sub> <sup>N</sup> -N <sup>AM</sup> -CH <sub>3</sub> <sup>N</sup>                                  |  | 25178                          | 109.5                       |                               |                            |
| N <sup>AM</sup> -CH <sub>2</sub> <sup>N</sup> -CH <sub>3</sub> <sup>alk</sup>                                |  | 28300                          | 109.5                       |                               |                            |
| CH <sub>2</sub> <sup>N</sup> -CH <sub>2</sub> <sup>alk</sup> -CH <sub>2</sub> <sup>alk</sup>                 |  | 31250                          | 114                         |                               |                            |
| CH <sub>2</sub> <sup>alk</sup> -CH <sub>2</sub> <sup>alk</sup> -CH <sub>3</sub> <sup>alk</sup>               |  | 31250                          | 114                         |                               |                            |
| Torsion terms                                                                                                |  |                                |                             |                               |                            |
| Ethanol (CHARMM)                                                                                             |  |                                |                             |                               |                            |
|                                                                                                              |  | $a_0 / \text{kJ mol}^{-1}$     | $a_1 / \text{kJ mol}^{-1}$  | $a_2 / \text{kJ mol}^{-1}$    | $a_3 / \text{kJ mol}^{-1}$ |
| CH <sub>3</sub> <sup>alk</sup> -CH <sub>2</sub> <sup>A</sup> -O <sup>A</sup> -H <sup>A</sup>                 |  | 0                              | 1.74                        | -0.243                        | 1.56                       |
| 1-Propanol (CHARMM)                                                                                          |  |                                |                             |                               |                            |
|                                                                                                              |  | $a_0 / \text{kJ mol}^{-1}$     | $a_1 / \text{kJ mol}^{-1}$  | $a_2 / \text{kJ mol}^{-1}$    | $a_3 / \text{kJ mol}^{-1}$ |
| CH <sub>3</sub> <sup>alk</sup> -CH <sub>2</sub> <sup>alk</sup> -CH <sub>2</sub> <sup>A</sup> -O <sup>A</sup> |  | 0                              | 1.47                        | -0.444                        | 6.40                       |
| CH <sub>2</sub> <sup>alk</sup> -CH <sub>2</sub> <sup>A</sup> -O <sup>A</sup> -H <sup>A</sup>                 |  | 0                              | 1.75                        | -0.243                        | 1.56                       |
| Dimethylformamide (OPLS)                                                                                     |  |                                |                             |                               |                            |
|                                                                                                              |  | $a_0 / \text{kJ mol}^{-1}$     | $n$                         | $\delta / \text{kJ mol}^{-1}$ |                            |
| H <sup>DMF</sup> -C <sup>DMF</sup> -N <sup>DMF</sup> -CH <sub>3,1</sub> <sup>DMF</sup>                       |  | 0                              | 0                           | 41.84                         |                            |
| H <sup>DMF</sup> -C <sup>DMF</sup> -N <sup>DMF</sup> -CH <sub>3,2</sub> <sup>DMF</sup>                       |  | 1                              | 2                           | 41.84                         |                            |

|                                                                                                     |                                 |                            |                            |                               |
|-----------------------------------------------------------------------------------------------------|---------------------------------|----------------------------|----------------------------|-------------------------------|
| $\text{O}^{\text{DMF}}\text{-C}^{\text{DMF}}\text{-N}^{\text{DMF}}\text{-CH}_{3,1}^{\text{DMF}}$    |                                 | 1                          | 2                          | 41.84                         |
| $\text{O}^{\text{DMF}}\text{-C}^{\text{DMF}}\text{-N}^{\text{DMF}}\text{-CH}_{3,2}^{\text{DMF}}$    |                                 | 1                          | 2                          | 41.84                         |
|                                                                                                     | Dimethylsulfoxide (no dihedral) |                            |                            |                               |
| Bis(trifluoromethylsulfonyl)imide (mixture of OPLS & CHARMM)                                        |                                 |                            |                            |                               |
|                                                                                                     | $a_0 / \text{kJ mol}^{-1}$      | $a_1 / \text{kJ mol}^{-1}$ | $a_2 / \text{kJ mol}^{-1}$ | $a_3 / \text{kJ mol}^{-1}$    |
| $\text{CF}_3^{\text{Tf2N}}\text{-S}^{\text{Tf2N}}\text{-N}^{\text{Tf2N}}\text{-S}^{\text{Tf2N}}$    | 0                               | 3.83                       | -4.37                      | -1.60                         |
|                                                                                                     |                                 | $a_0 / \text{kJ mol}^{-1}$ | $n$                        | $\delta / \text{kJ mol}^{-1}$ |
| $\text{S}^{\text{Tf2N}}\text{-N}^{\text{Tf2N}}\text{-S}^{\text{Tf2N}}\text{-O}^{\text{Tf2N}}$       |                                 | 3.35                       | 3                          | 0                             |
|                                                                                                     | $a_0 / \text{kJ mol}^{-1}$      | $a_1 / \text{kJ mol}^{-1}$ | $a_2 / \text{kJ mol}^{-1}$ | $a_3 / \text{kJ mol}^{-1}$    |
| $\text{S}^{\text{Tf2N}}\text{-N}^{\text{Tf2N}}\text{-S}^{\text{Tf2N}}\text{-CF}_3^{\text{Tf2N}}$    | 0                               | 3.83                       | -4.37                      | -1.60                         |
| Trimethylbutylammonium (mixture of OPLS & CHARMM)                                                   |                                 |                            |                            |                               |
|                                                                                                     |                                 | $a_0 / \text{kJ mol}^{-1}$ | $n$                        | $\delta / \text{kJ mol}^{-1}$ |
| $\text{CH}_3^{\text{N}}\text{-N}^{\text{AM}}\text{-CH}_2^{\text{N}}\text{-CH}_2^{\text{alk}}$       |                                 | 0.65                       | 3                          | 59.99                         |
| $\text{N}^{\text{AM}}\text{-CH}_2^{\text{N}}\text{-CH}_2^{\text{alk}}\text{-CH}_2^{\text{alk}}$     |                                 | 0.65                       | 3                          | -179.99                       |
|                                                                                                     | $a_0 / \text{kJ mol}^{-1}$      | $a_1 / \text{kJ mol}^{-1}$ | $a_2 / \text{kJ mol}^{-1}$ | $a_3 / \text{kJ mol}^{-1}$    |
| $\text{CH}_2^{\text{N}}\text{-CH}_2^{\text{alk}}\text{-CH}_2^{\text{alk}}\text{-CH}_3^{\text{alk}}$ | 0                               | 2.79                       | -0.57                      | 6.58                          |





## S2. TraPPE-UA RESULTS FOR ETHANOL AND 1-PROPANOL

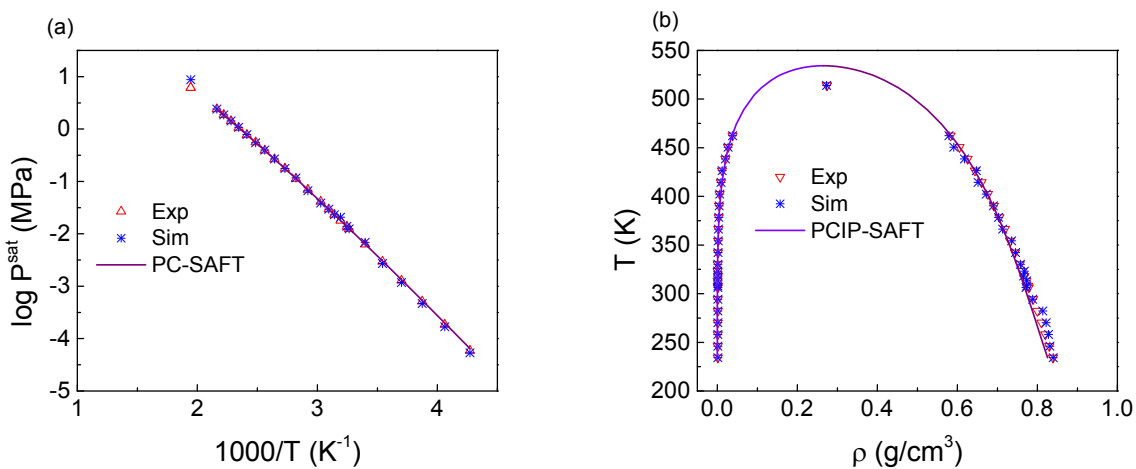

**Figure S1.** Vapor pressure and phase coexistence curve for ethanol based on TraPPE-UA force field.<sup>13-15</sup>

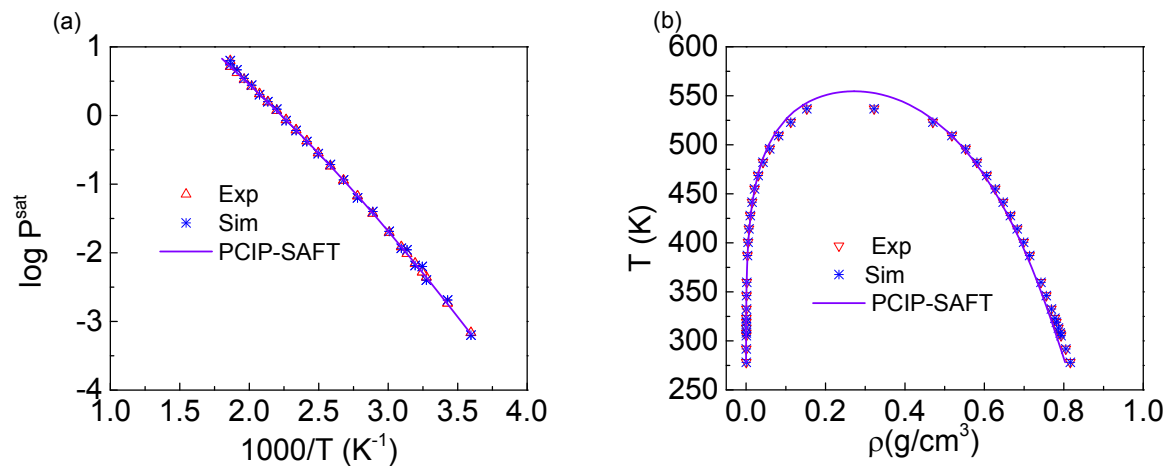

**Figure S2.** Vapor pressure and phase coexistence curve for 1-propanol based on TraPPE-UA force field.

### S3. EXCESS AND MIXING VOLUME TRENDS

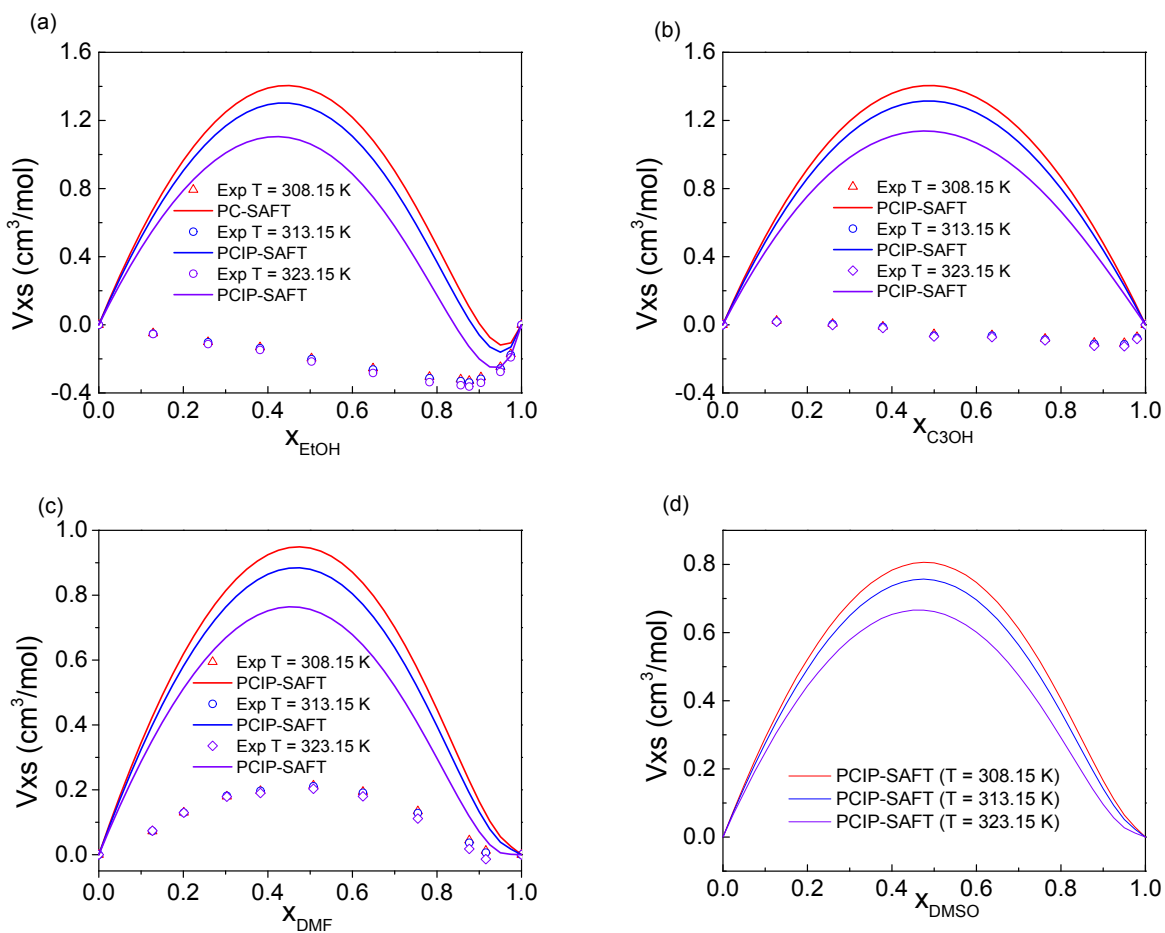

**Figure S3.** Trends in the excess volume of the mixing based on the experimental data and PCIP-SAFT theory for EtOH (a), C3OH (b), DMF (c), and DMSO (d). The simulation results oscillate around zero and are not shown here.

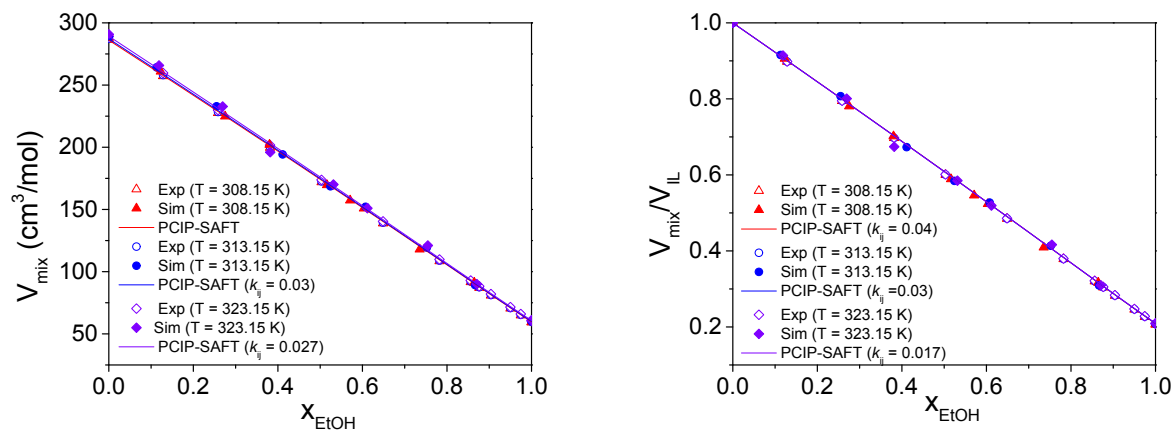

**Figure S4.** Comparison between experimental, simulation, and PCIP-SAFT theory for mixture molar volumes versus mole fraction of EtOH. The experimental data are taken from Massel et al.<sup>16</sup> The open symbols show the experimental data, the filled symbols are the MC-NPT simulation results, and the lines represent the PCIP-SAFT theory results.

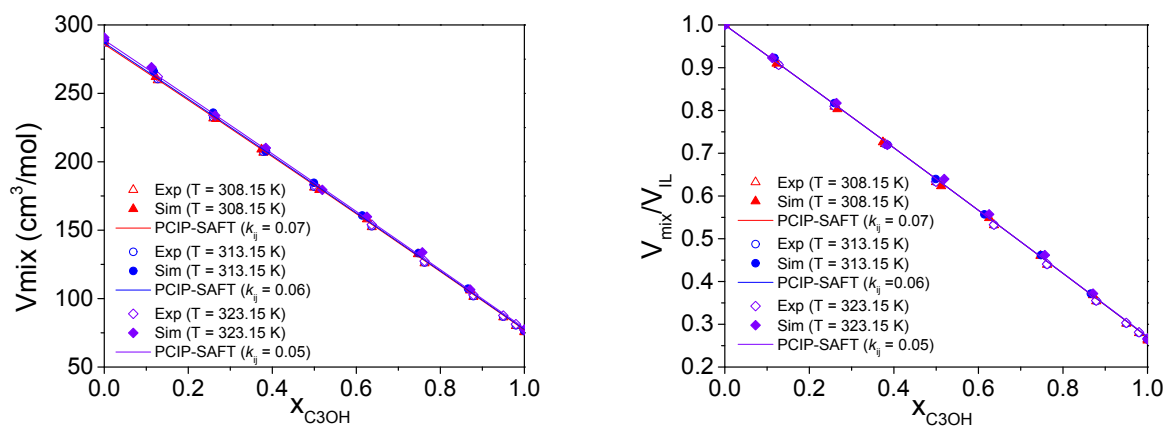

**Figure S5.** Comparison between experimental, simulation, and PCIP-SAFT theory for mixture molar volumes versus mole fraction of C3OH. The experimental data are taken from Massel et al.<sup>16</sup> The open symbols show the experimental data, the filled symbols are the MC-NPT simulation results, and the lines represent the PCIP-SAFT theory results.

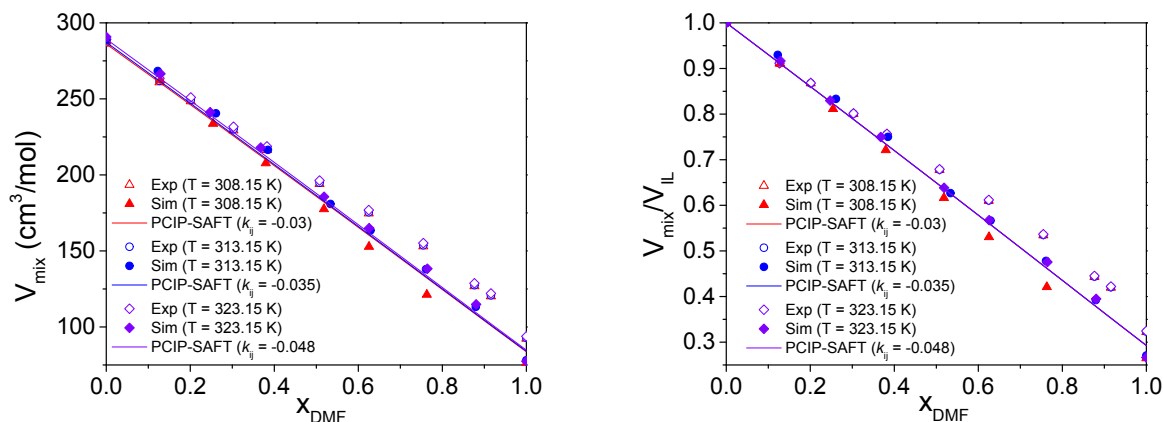

**Figure S6.** Comparison between experimental, simulation, and PCIP-SAFT theory for mixture molar volumes versus mole fraction of DMF. The experimental data are taken from Massel et al.<sup>16</sup> The open symbols show the experimental data, the filled symbols are the MC-NPT simulation results, and the lines represent the PCIP-SAFT theory results.

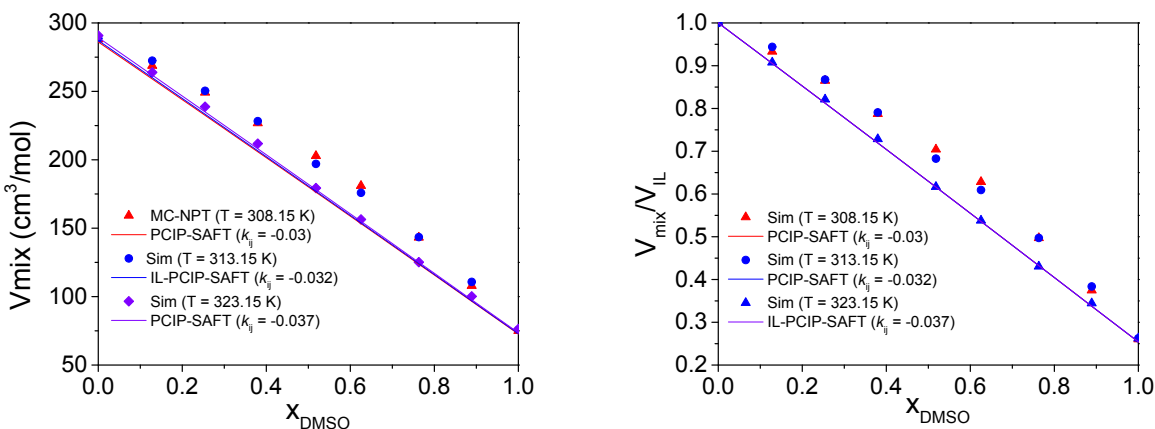

**Figure S7.** Comparison between experimental, simulation, and PCIP-SAFT theory for mixture molar volumes versus mole fraction of DMSO. The experimental data are taken from Massel et al.<sup>16</sup> The open symbols show the experimental data, the filled symbols are the MC-NPT simulation results, and the lines represent the PCIP-SAFT theory results.

## S4. IONIC LIQUID SITE-SOLUTES SDF

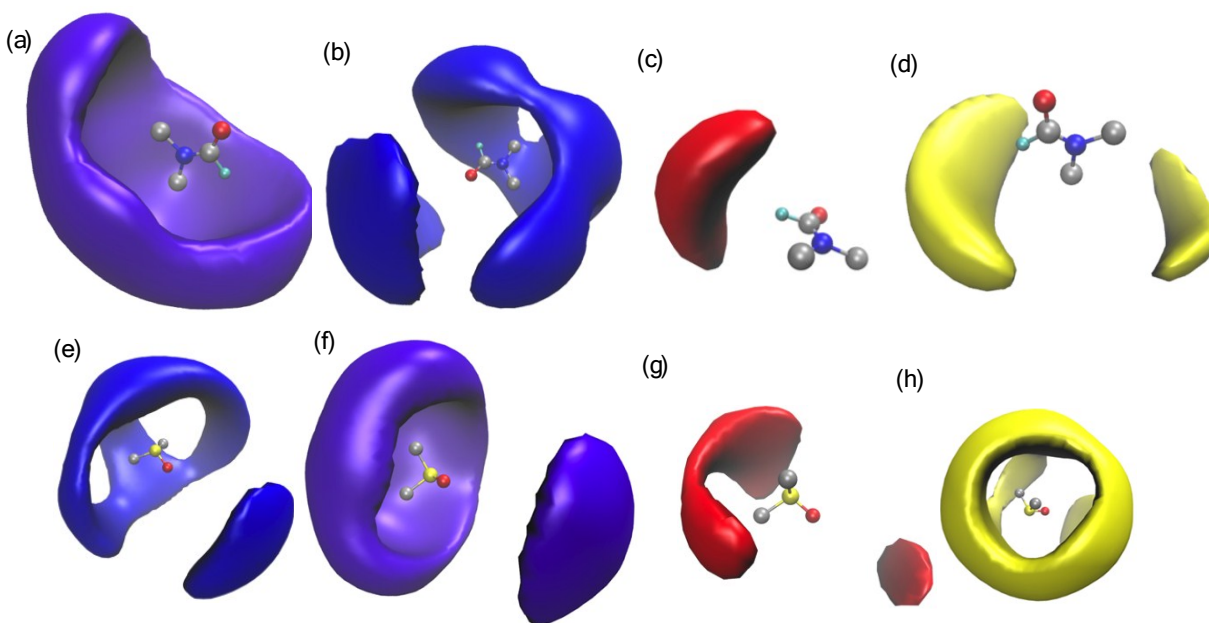

**Figure S8.** Spatial distribution function for (a) DMF- $\text{CF}_3^{\text{Anion}}$ , (b) DMF- $\text{N}^{\text{Anion}}$ , (c) DMF- $\text{O}^{\text{Anion}}$ , (d) DMF- $\text{S}^{\text{Anion}}$ , (e) DMSO-  $\text{CF}_3^{\text{Anion}}$ , (f) DMSO-  $\text{N}^{\text{Anion}}$ , (g) DMSO-  $\text{O}^{\text{Anion}}$ , (h) DMSO-  $\text{S}^{\text{Anion}}$ .

The isosurface value is chosen to be  $2.313 \text{ pm}^{-3}$  at concentration of 0.5 of the solutes.

## SUPPORTING REFERENCES

1. H. A. Lorentz, *AdP*, 1881, **248**, 127-136.
2. D. Berthelot, *l'Académie des Sciences*, 1898, **126**, 1703-1855.
3. X. Zhong, Z. Liu and D. Cao, *J Phys Chem B*, 2011, **115**, 10027-10040.
4. Z. P. Liu, X. P. Wu and W. C. Wang, *Phys. Chem. Chem. Phys.*, 2006, **8**, 1096-1104.
5. M. G. Martin and J. I. Siepmann, *J. Phys. Chem. B.*, 1998, **102**, 2569-2577.

6. C. D. Wick, J. M. Stubbs, N. Rai and J. I. Siepmann, *J. Phys. Chem. B.*, 2005, **109**, 18974-18982.
7. L. Zhang and J. I. Siepmann, *Collect. Czech. Chem. Comm.*, 2010, **75**, 577-591.
8. K. A. Maerzke, N. E. Schultz, R. B. Ross and J. I. Siepmann, *J. Phys. Chem. B.*, 2009, **113**, 6415-6425.
9. M. Chalaris and J. Samios, *J. Mol. Liq.*, 2002, **98-9**, 399-409.
10. M. Chalaris and J. Samios, *J. Chem. Phys.*, 2000, **112**, 8581-8594.
11. M. Chalaris and J. Samios, *J. Mol. Liq.*, 1998, **78**, 201-215.
12. R. L. Mancera, M. Chalaris, K. Refson and J. Samios, *Phys. Chem. Chem. Phys.*, 2004, **6**, 94-102.
13. R. Gopal and S. A. Rizvi, *J. Ind. Chem. Soc.*, 1968, **45**, 13-&.
14. C. M. French and K. H. Glover, *Trans. Faraday Soc.*, 1955, **51**, 1418-1427.
15. W. G. Boyle and R. J. Robinson, *Anal. Chem.*, 1958, **30**, 958-961.
16. M. Massel, A.-L. Revelli, E. Patharik, R. R. Novak, M. Rauh and J. F. Brennecke, *J. Chem. Eng. Data*, 2014, **submitted**.
